# Supplementary material
Source: PubMed Central journal article supplement (PMC2253620)

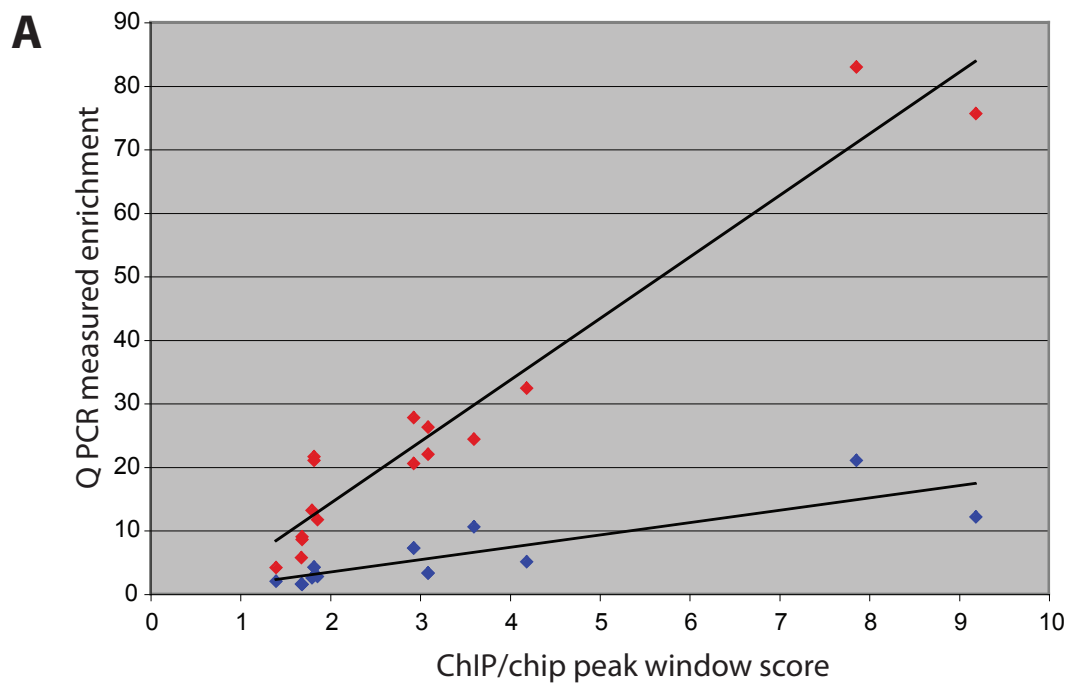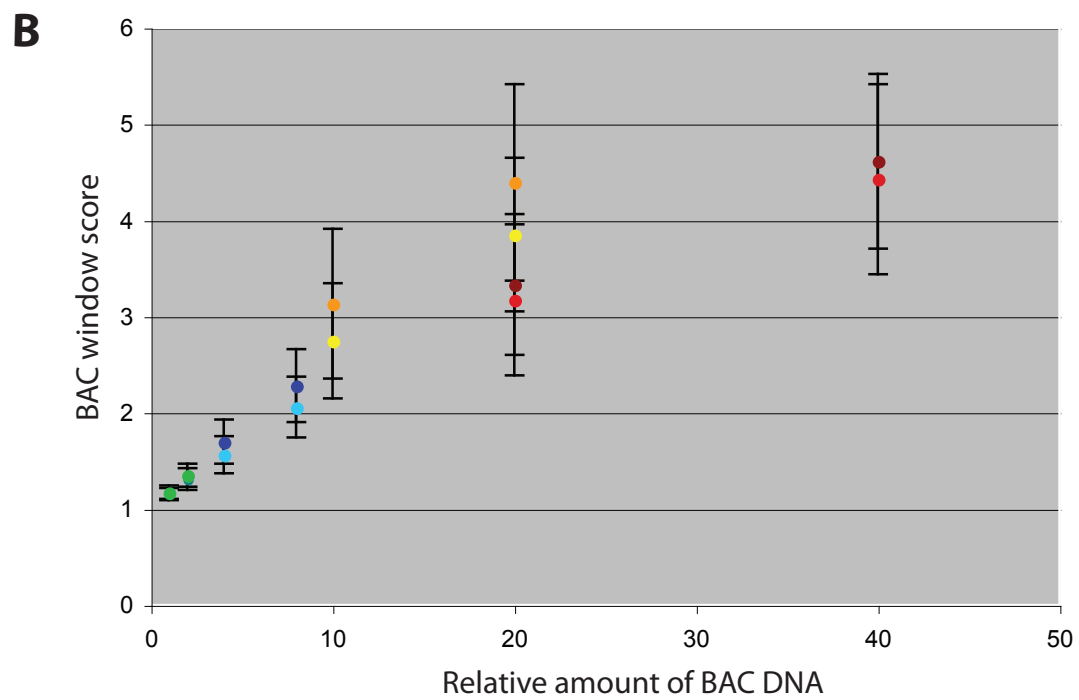

Figure S2

Supplement: pbio.0060027.sg002.pdf [file pbio.0060027.sg002.pdf]

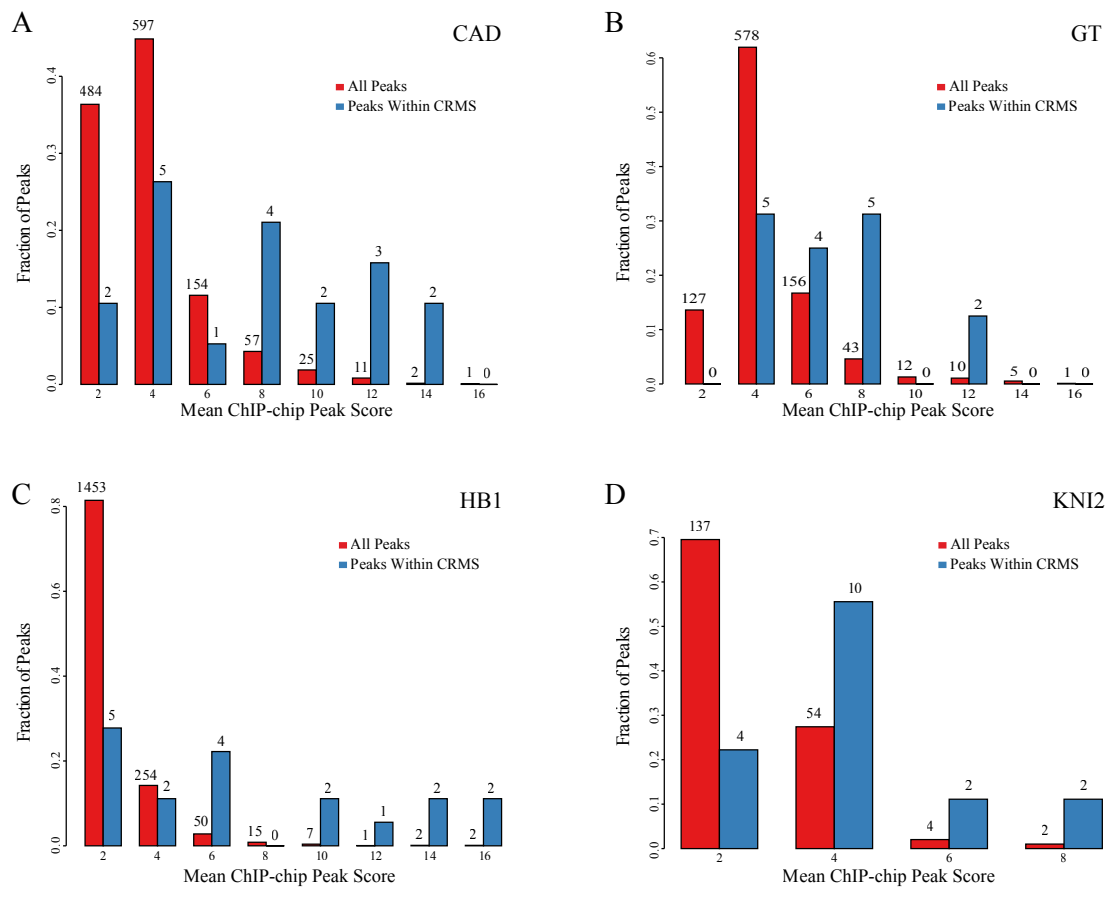

Figure S3

Supplement: pbio.0060027.sg003.pdf [file pbio.0060027.sg003.pdf]

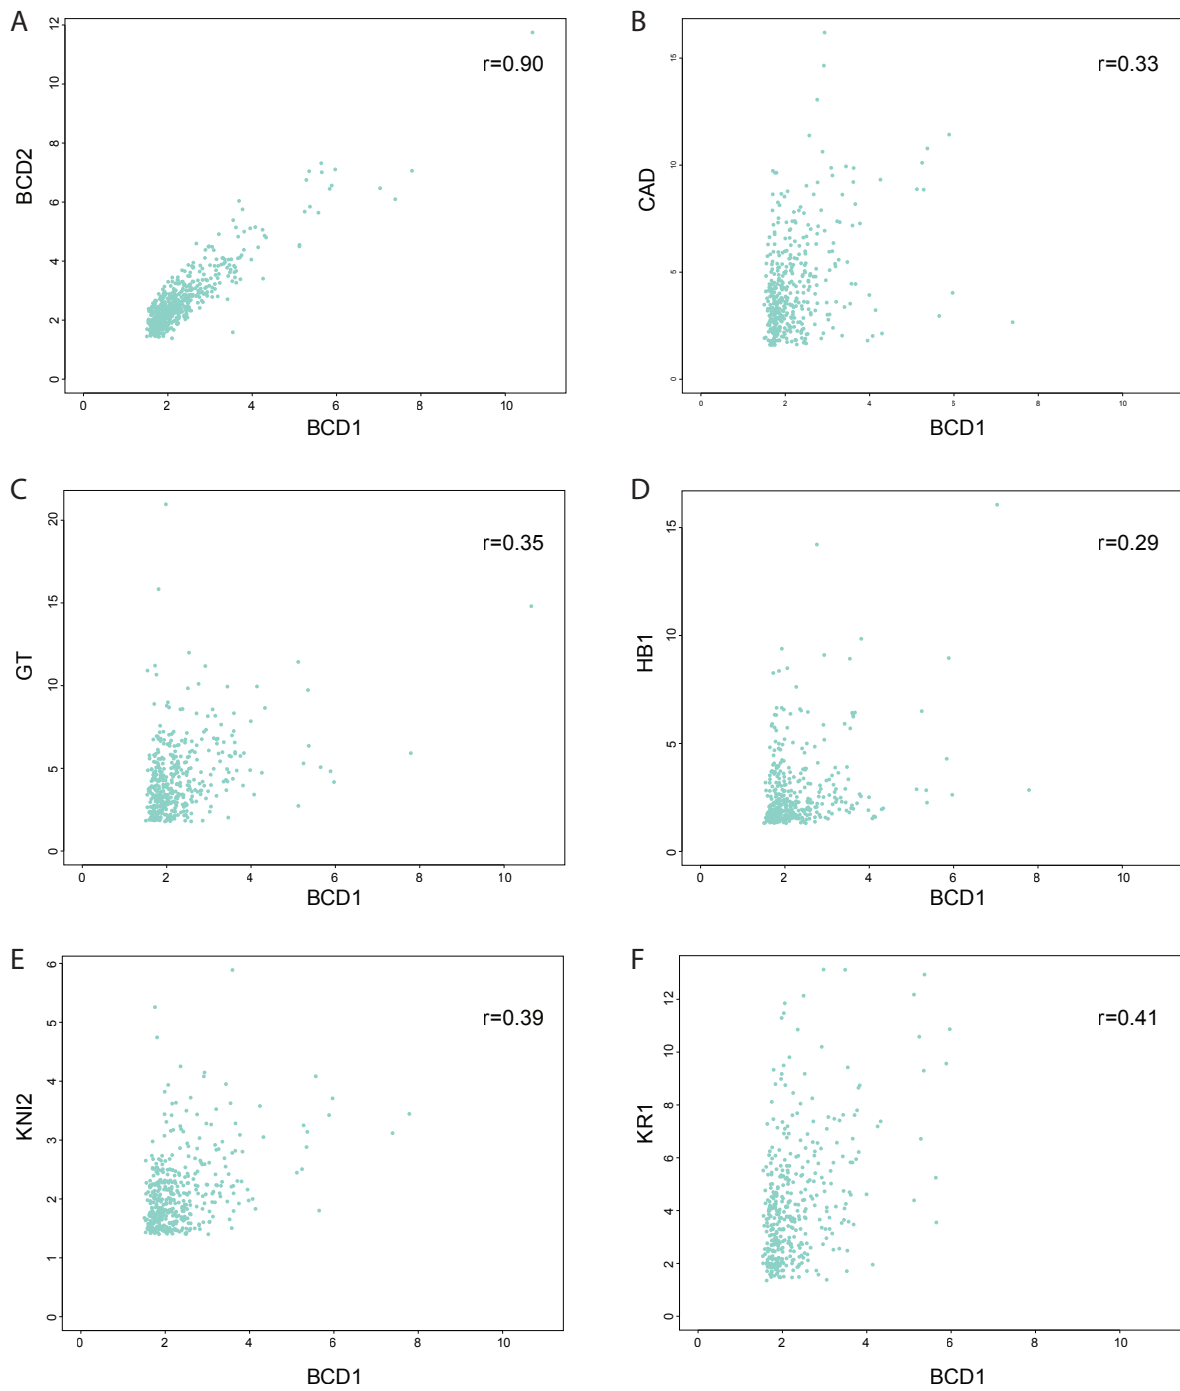

Figure S4-1

A

B

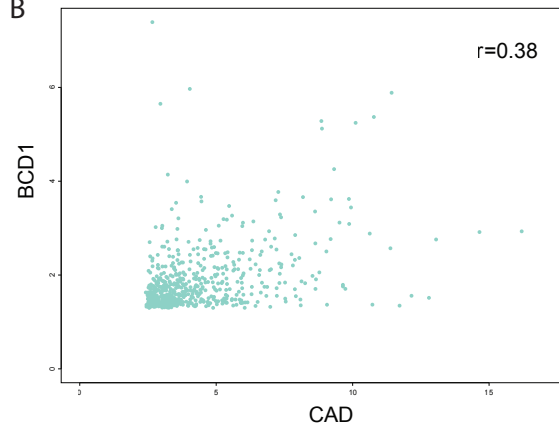

C

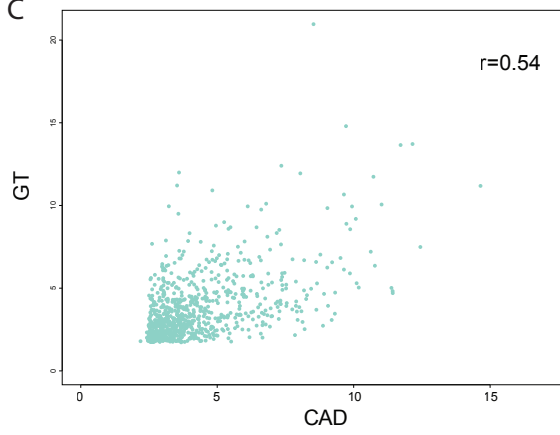

D

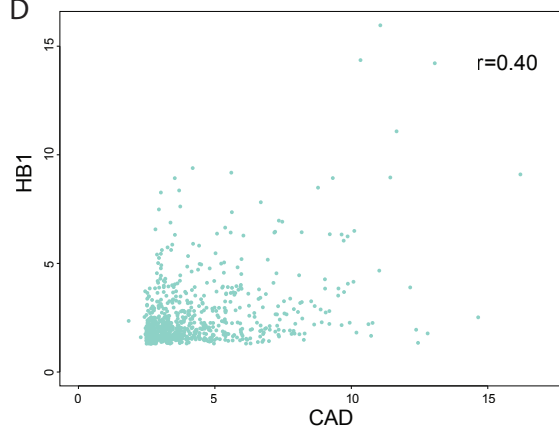

E

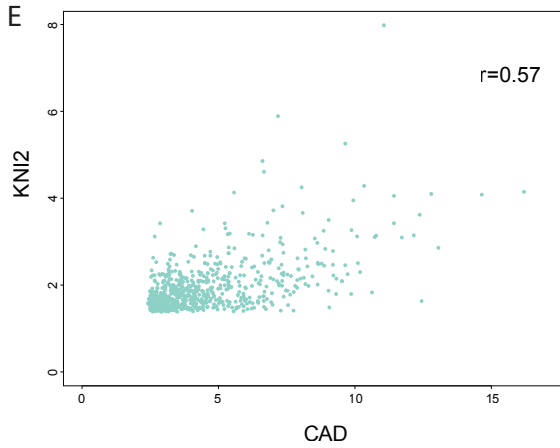

F

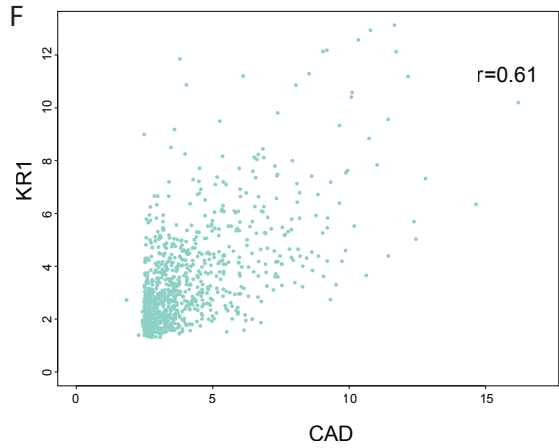

Figure S4-2

A

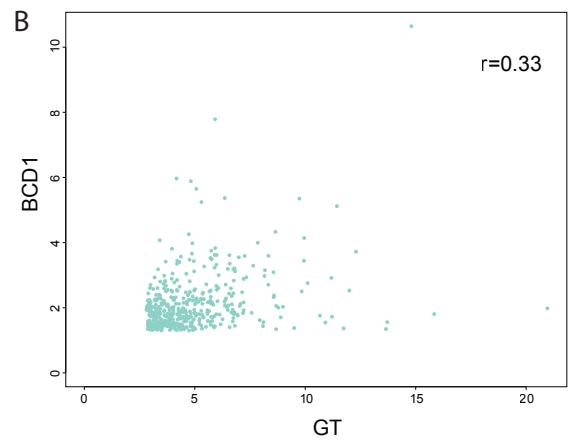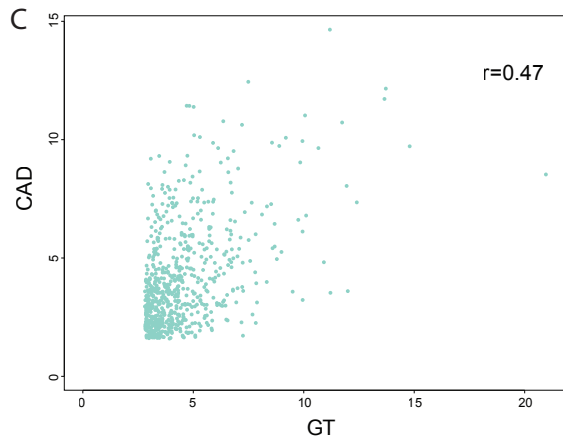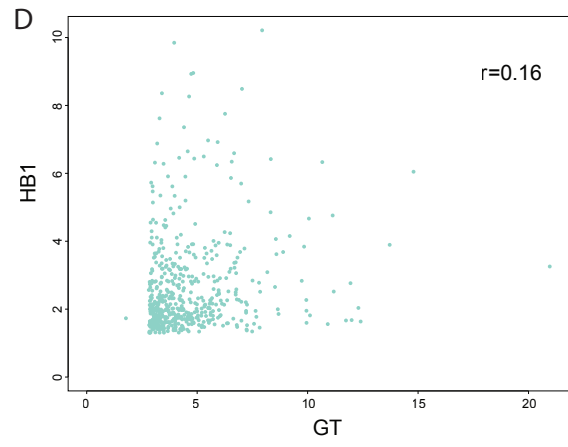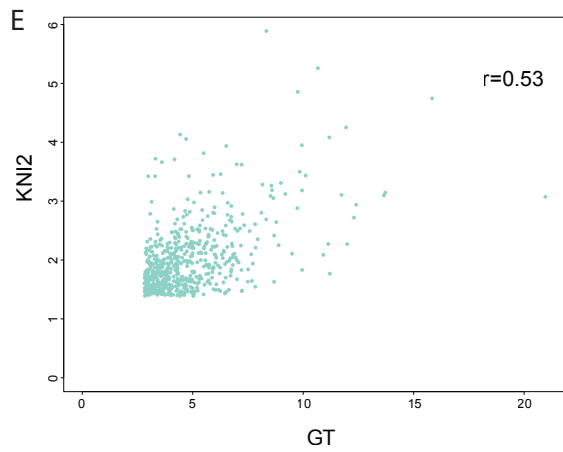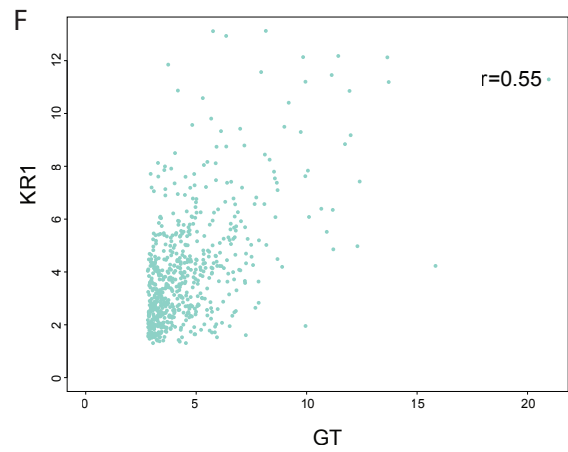

Figure S4-3

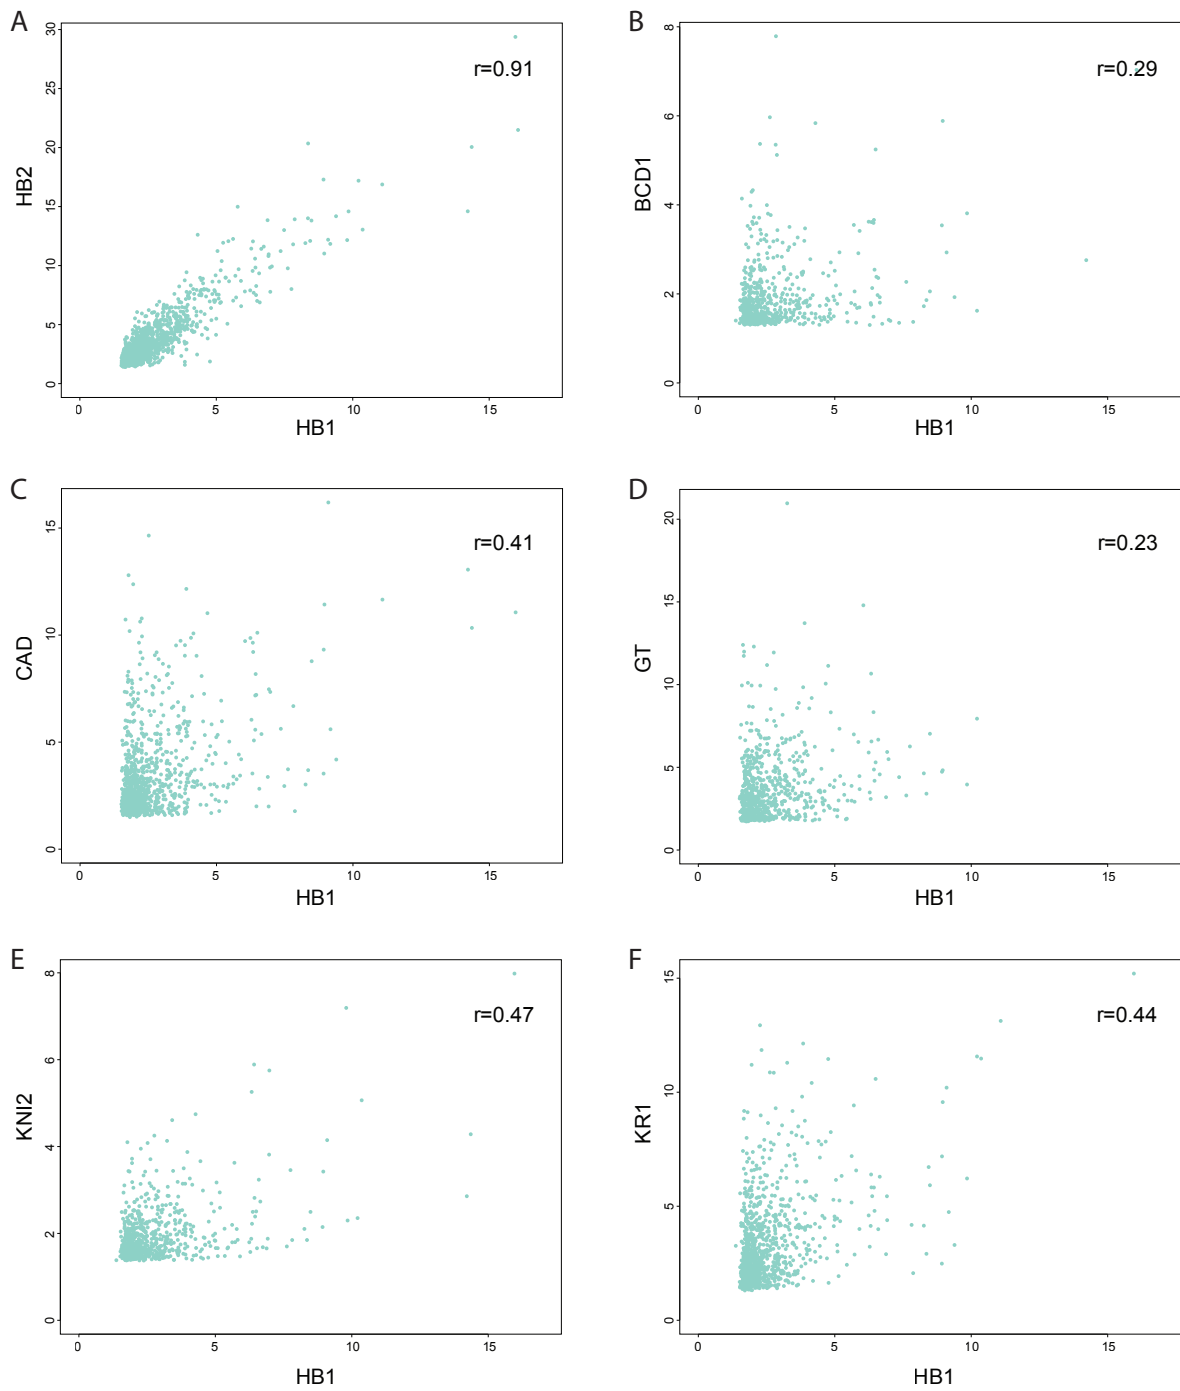

Figure S4-4

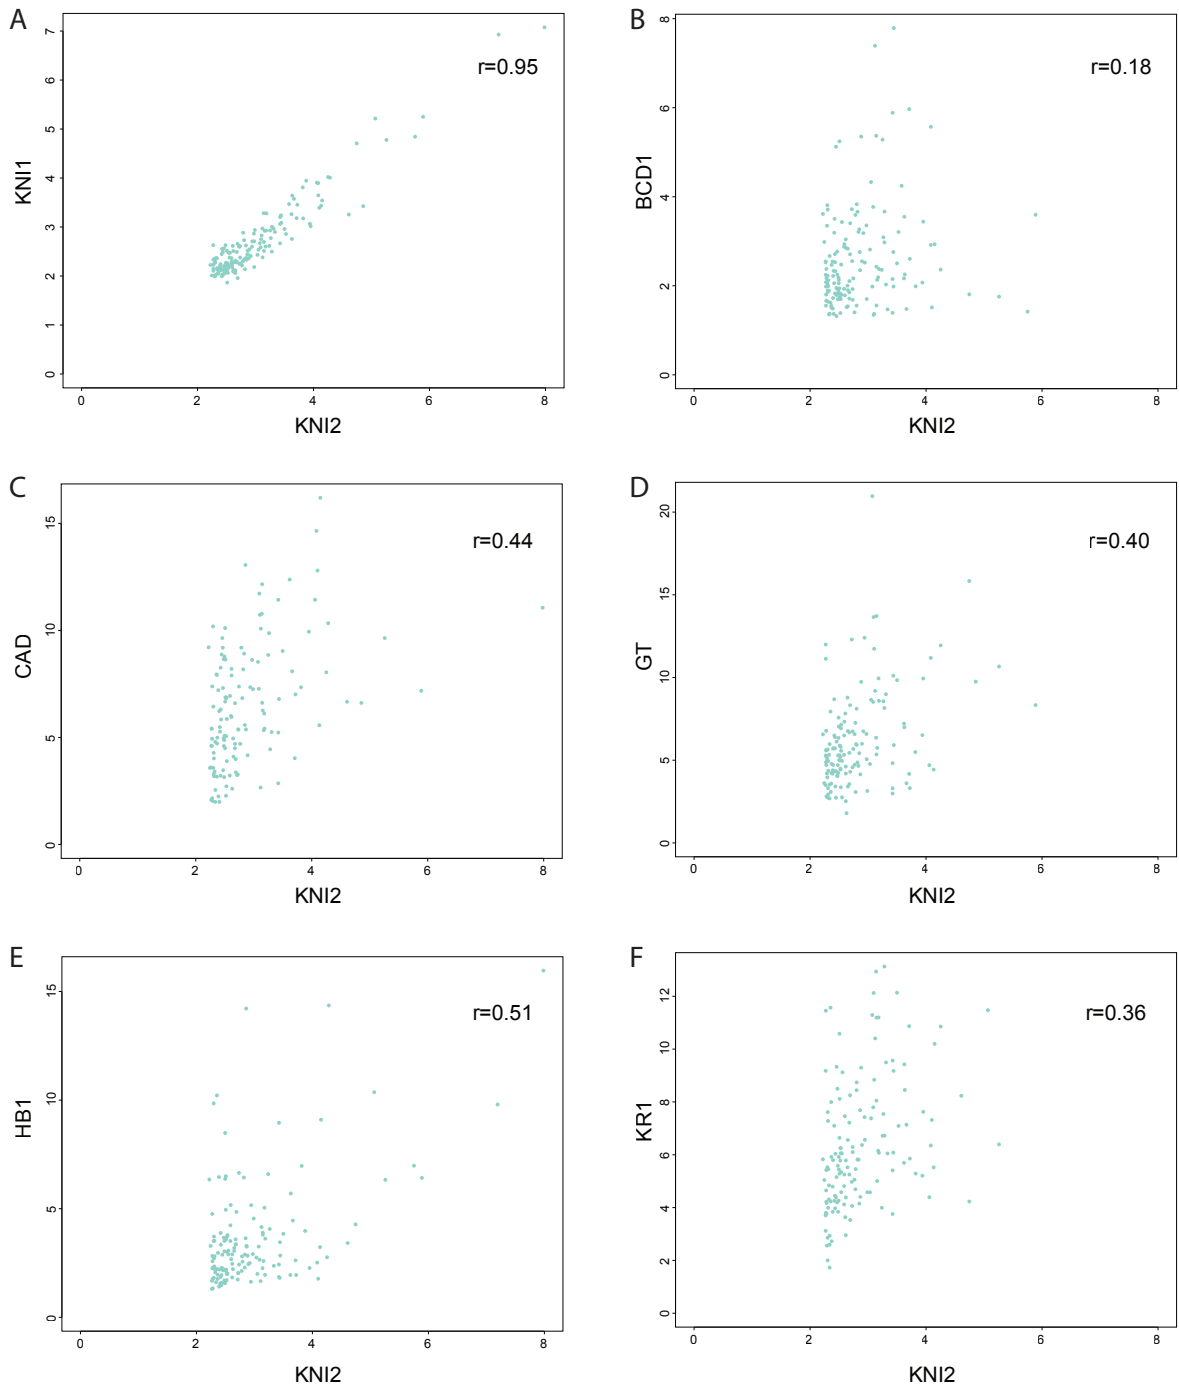

Figure S4-5

Supplement: pbio.0060027.sg004.pdf [file pbio.0060027.sg004.pdf]

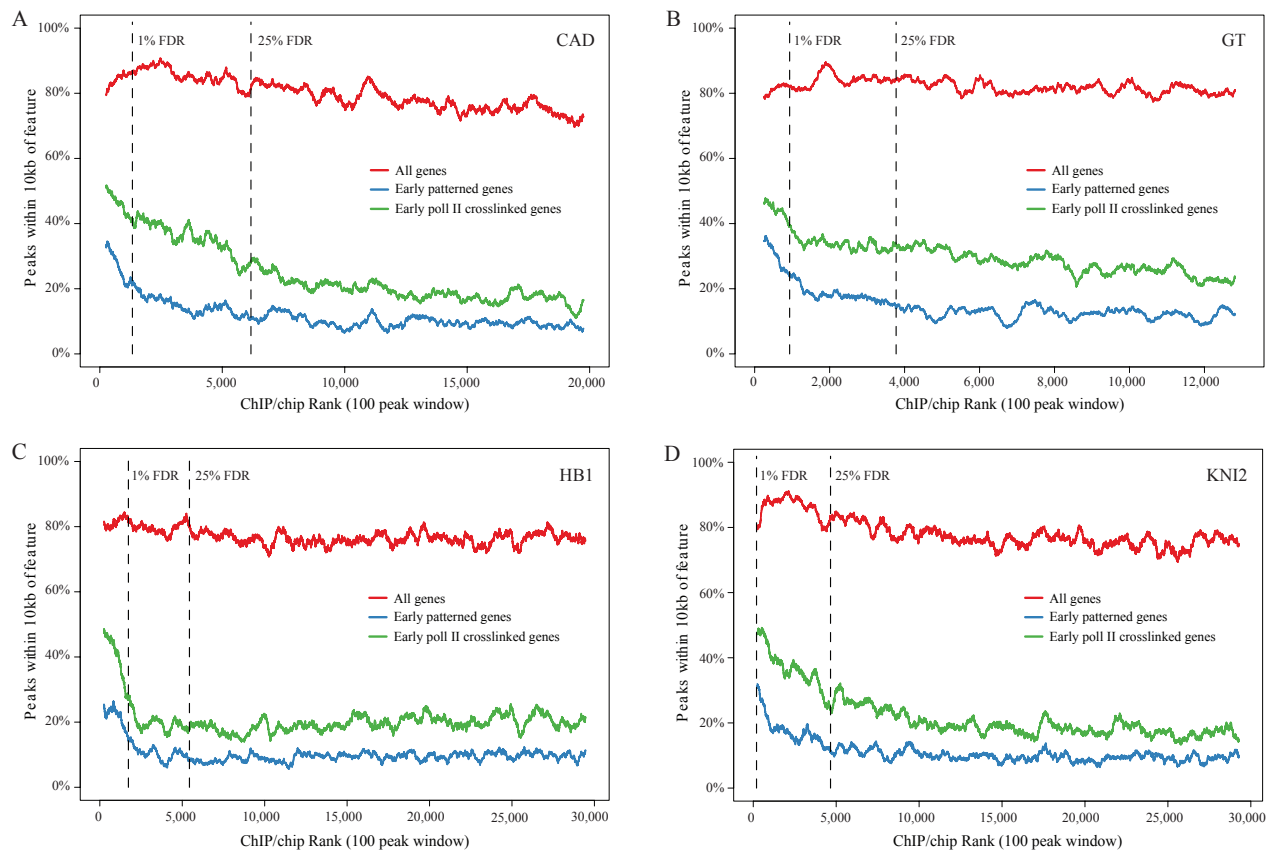

Figure S5

Supplement: pbio.0060027.sg005.pdf [file pbio.0060027.sg005.pdf]

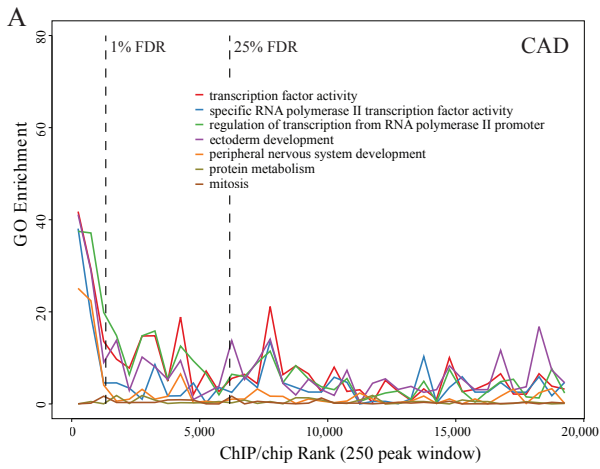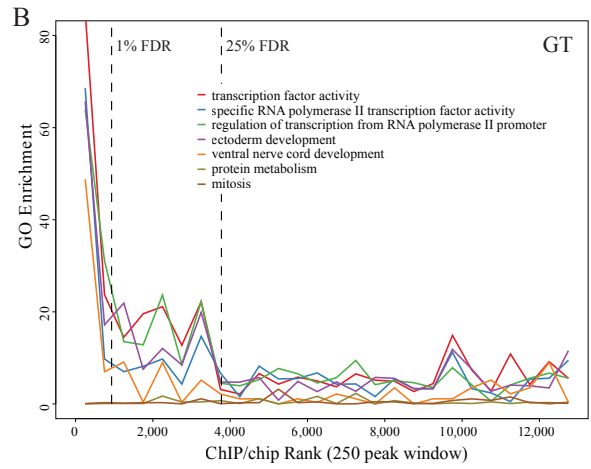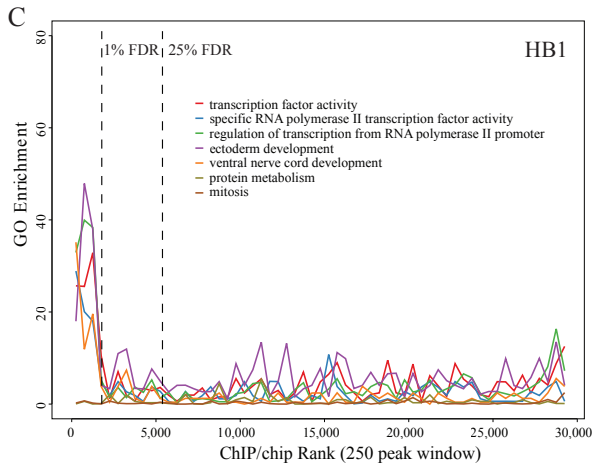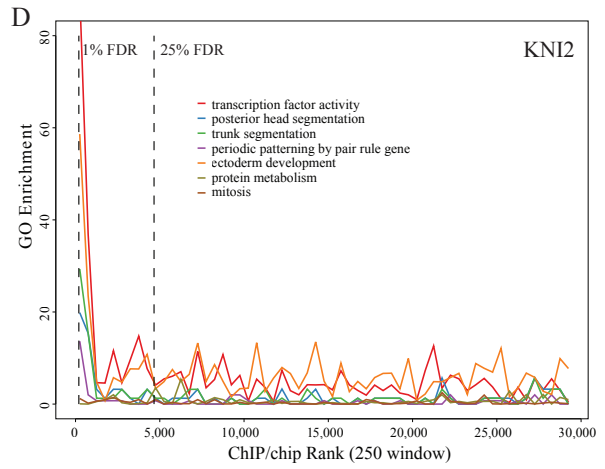

Figure S6

Supplement: pbio.0060027.sg006.pdf [file pbio.0060027.sg006.pdf]

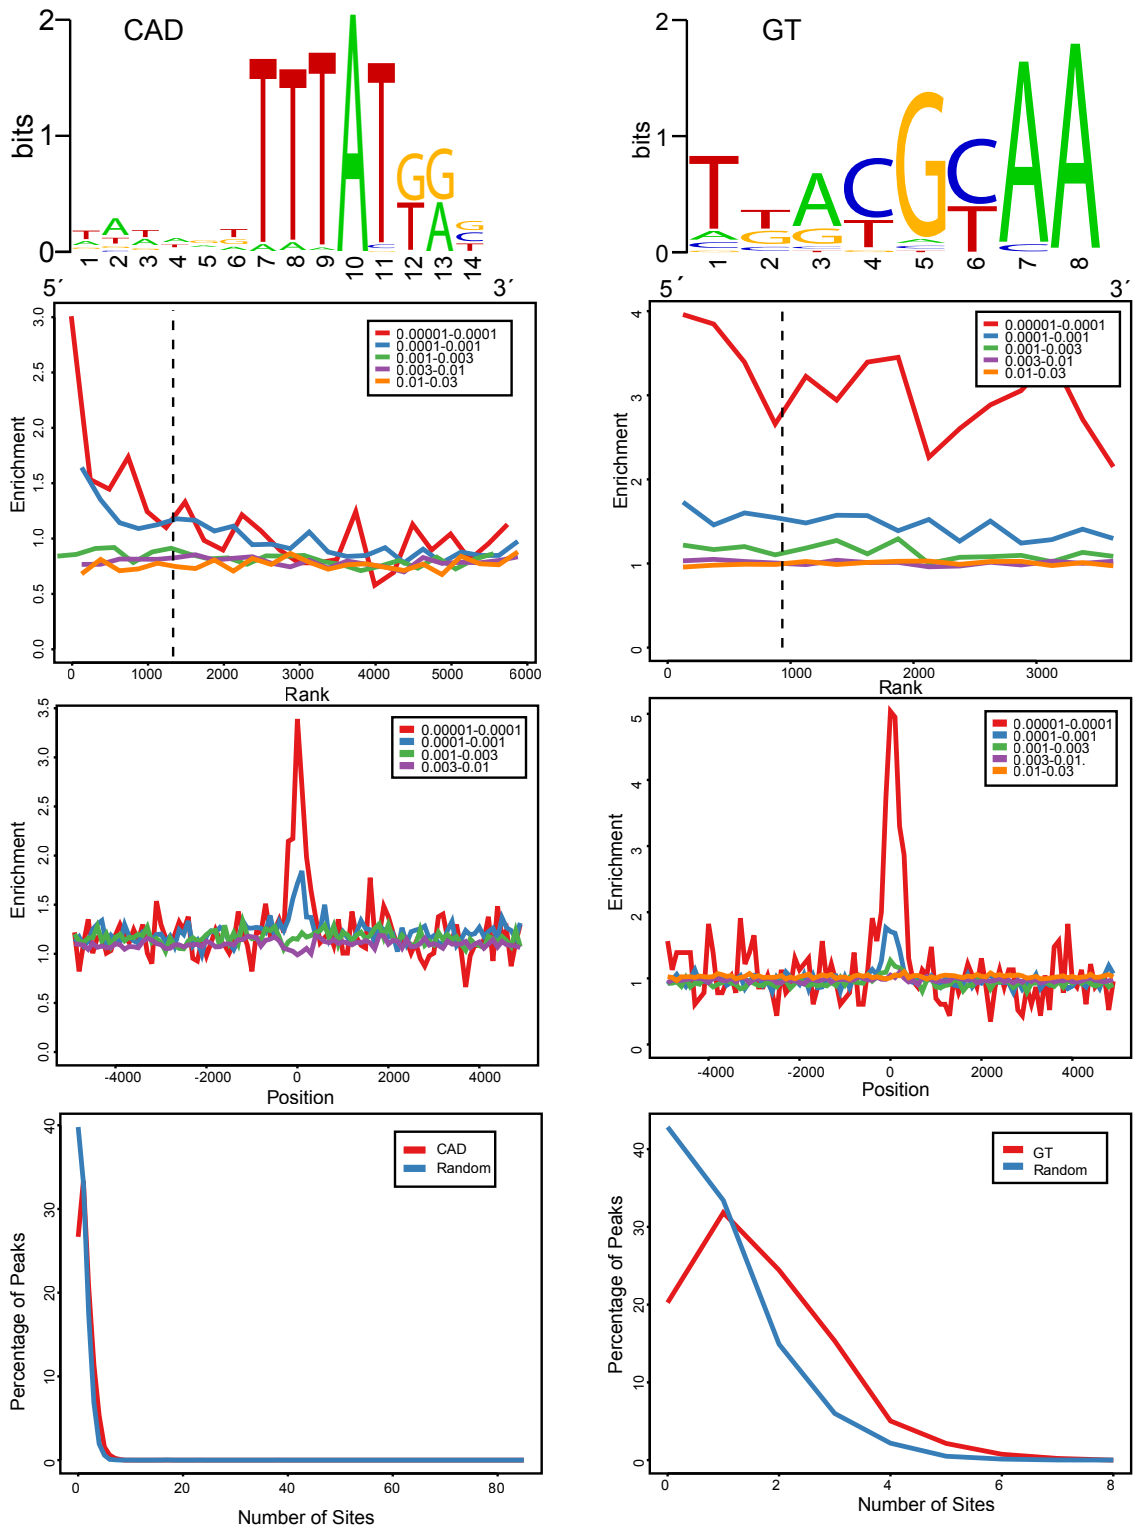

Figure S7-1

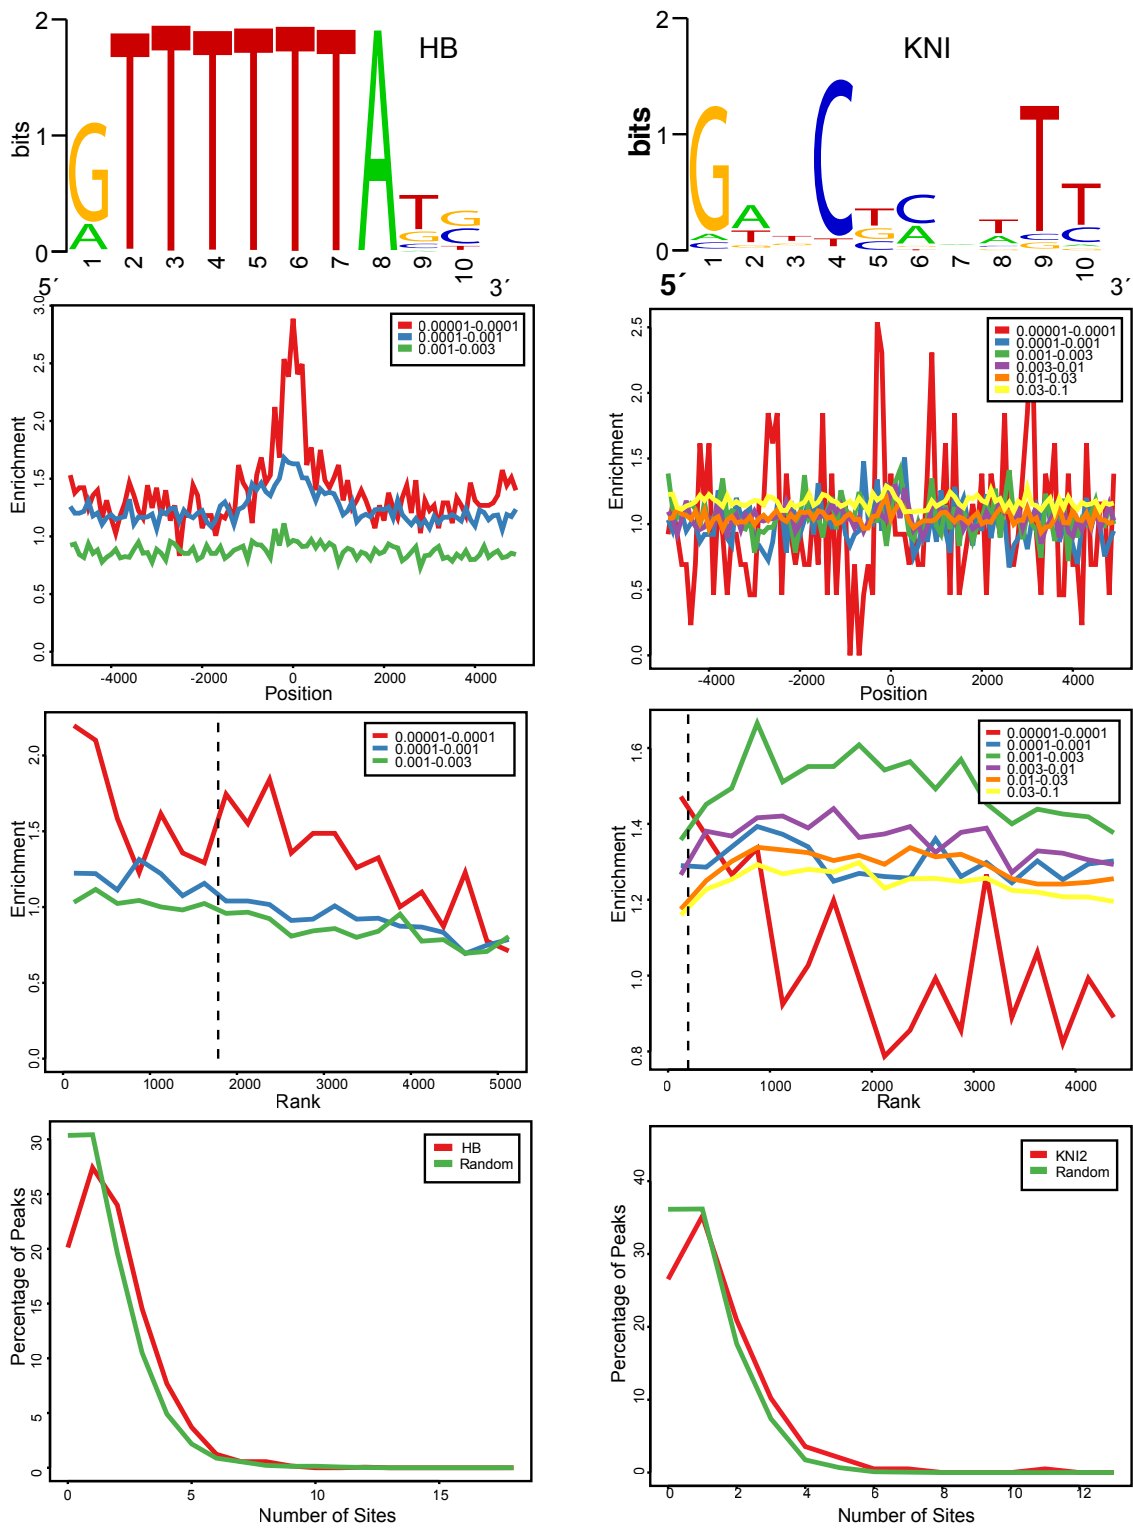

Figure S7-2

Supplement: pbio.0060027.sg007.pdf [file pbio.0060027.sg007.pdf]

1X

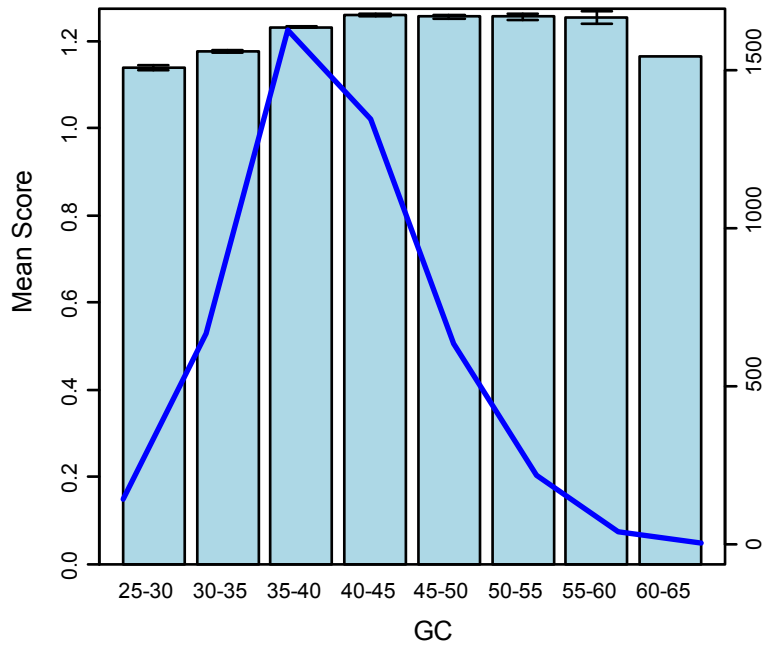

10X

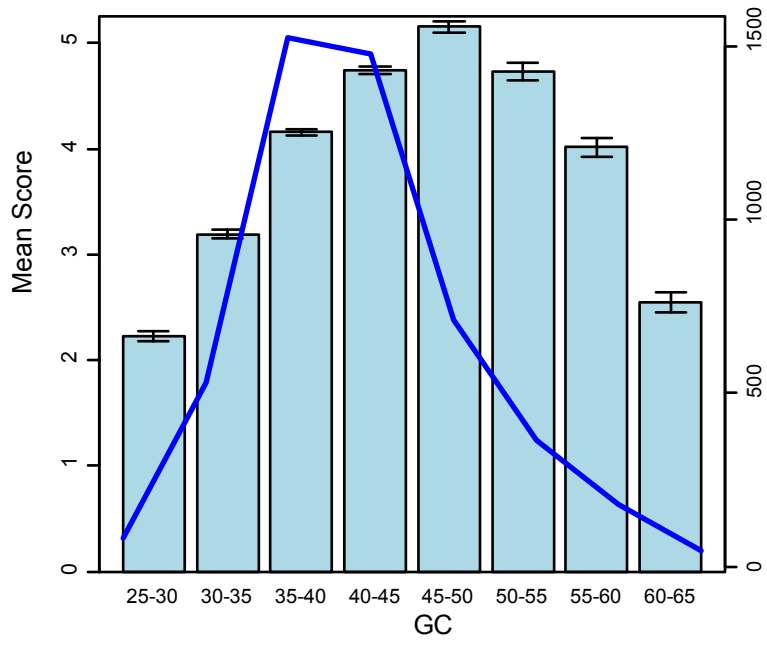

Figure S8

Supplement: pbio.0060027.sg008.pdf [file pbio.0060027.sg008.pdf]

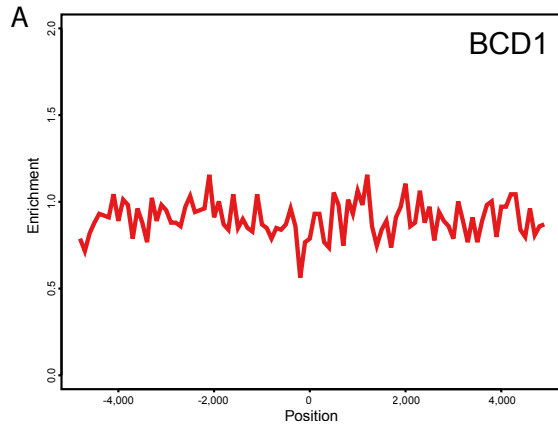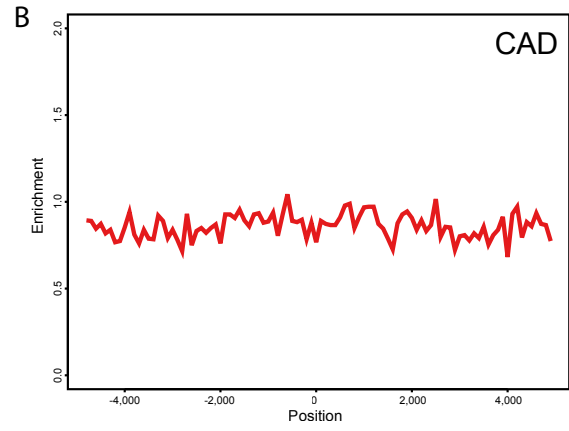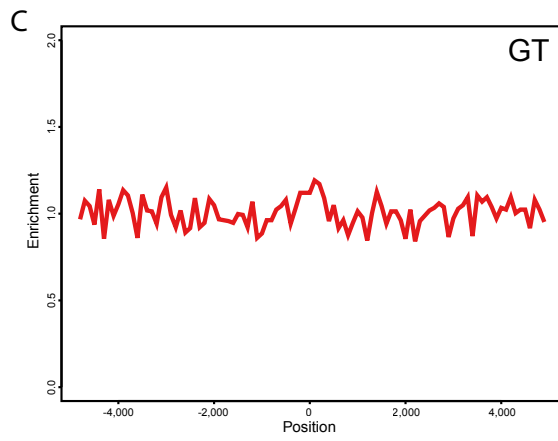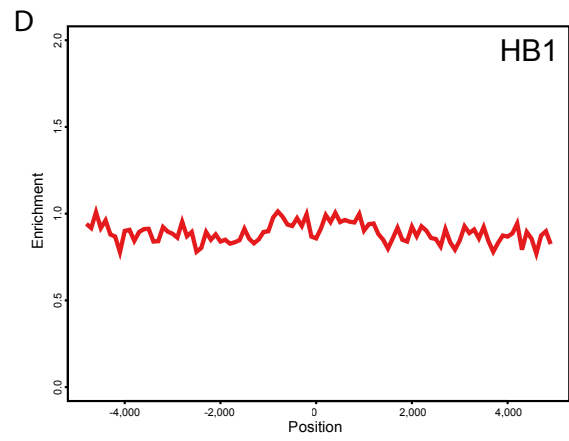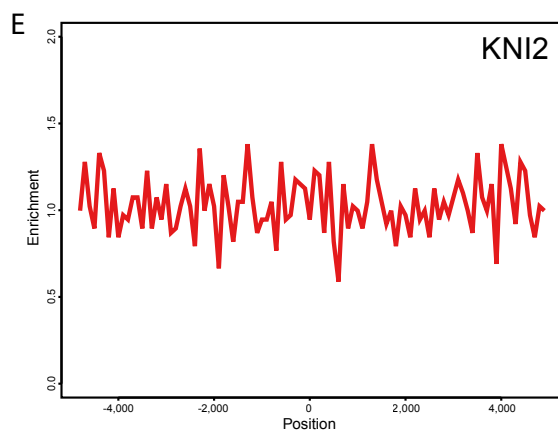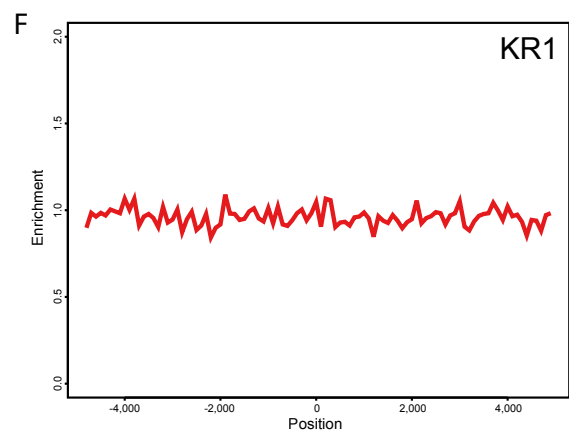

Figure S9

Supplement: pbio.0060027.sg009.pdf [file pbio.0060027.sg009.pdf]

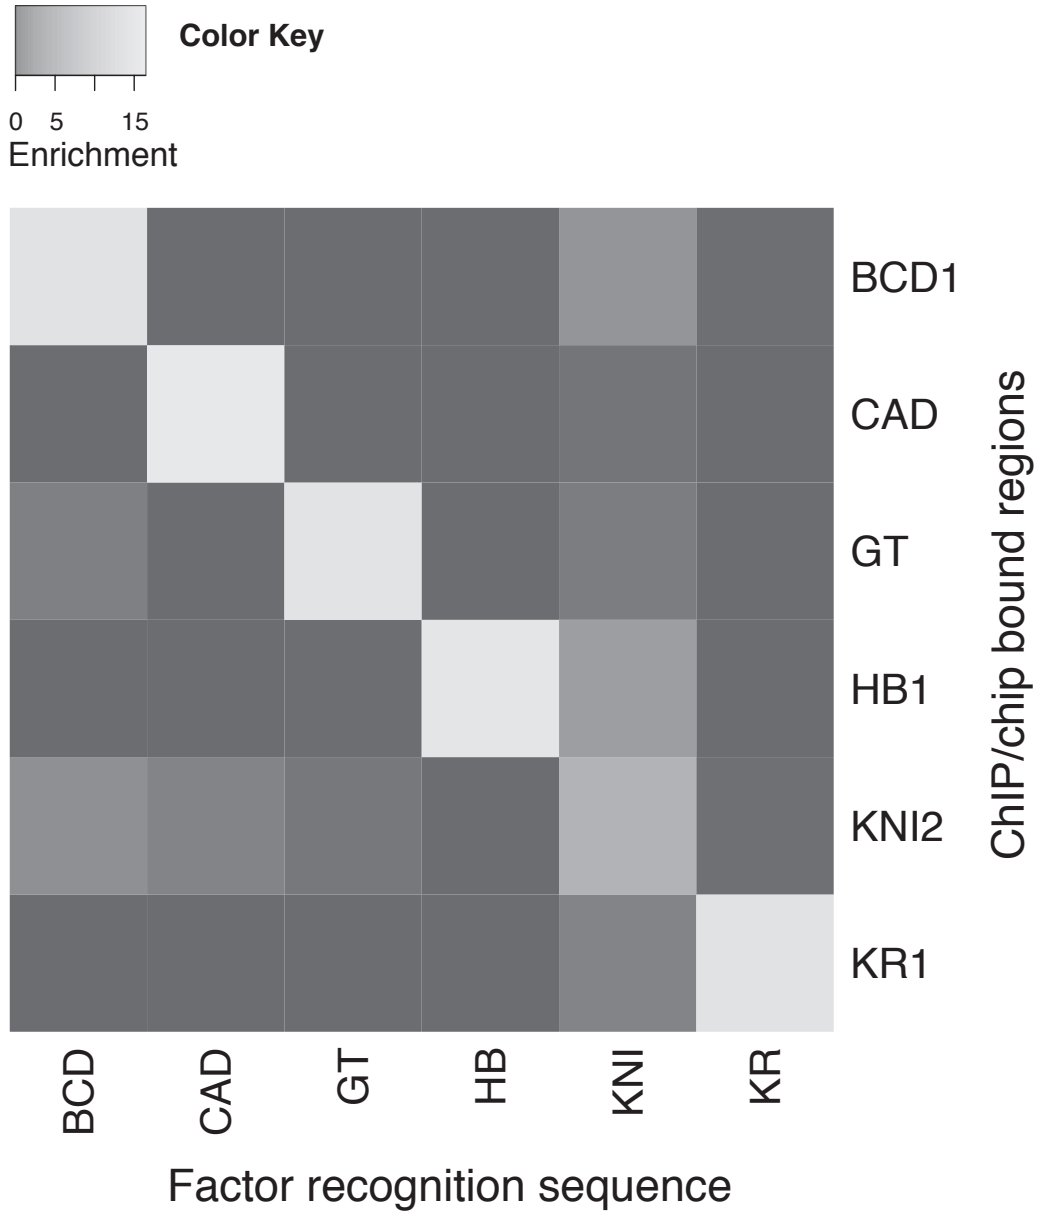

Figure S10

Supplement: pbio.0060027.sg010.pdf [file pbio.0060027.sg010.pdf]

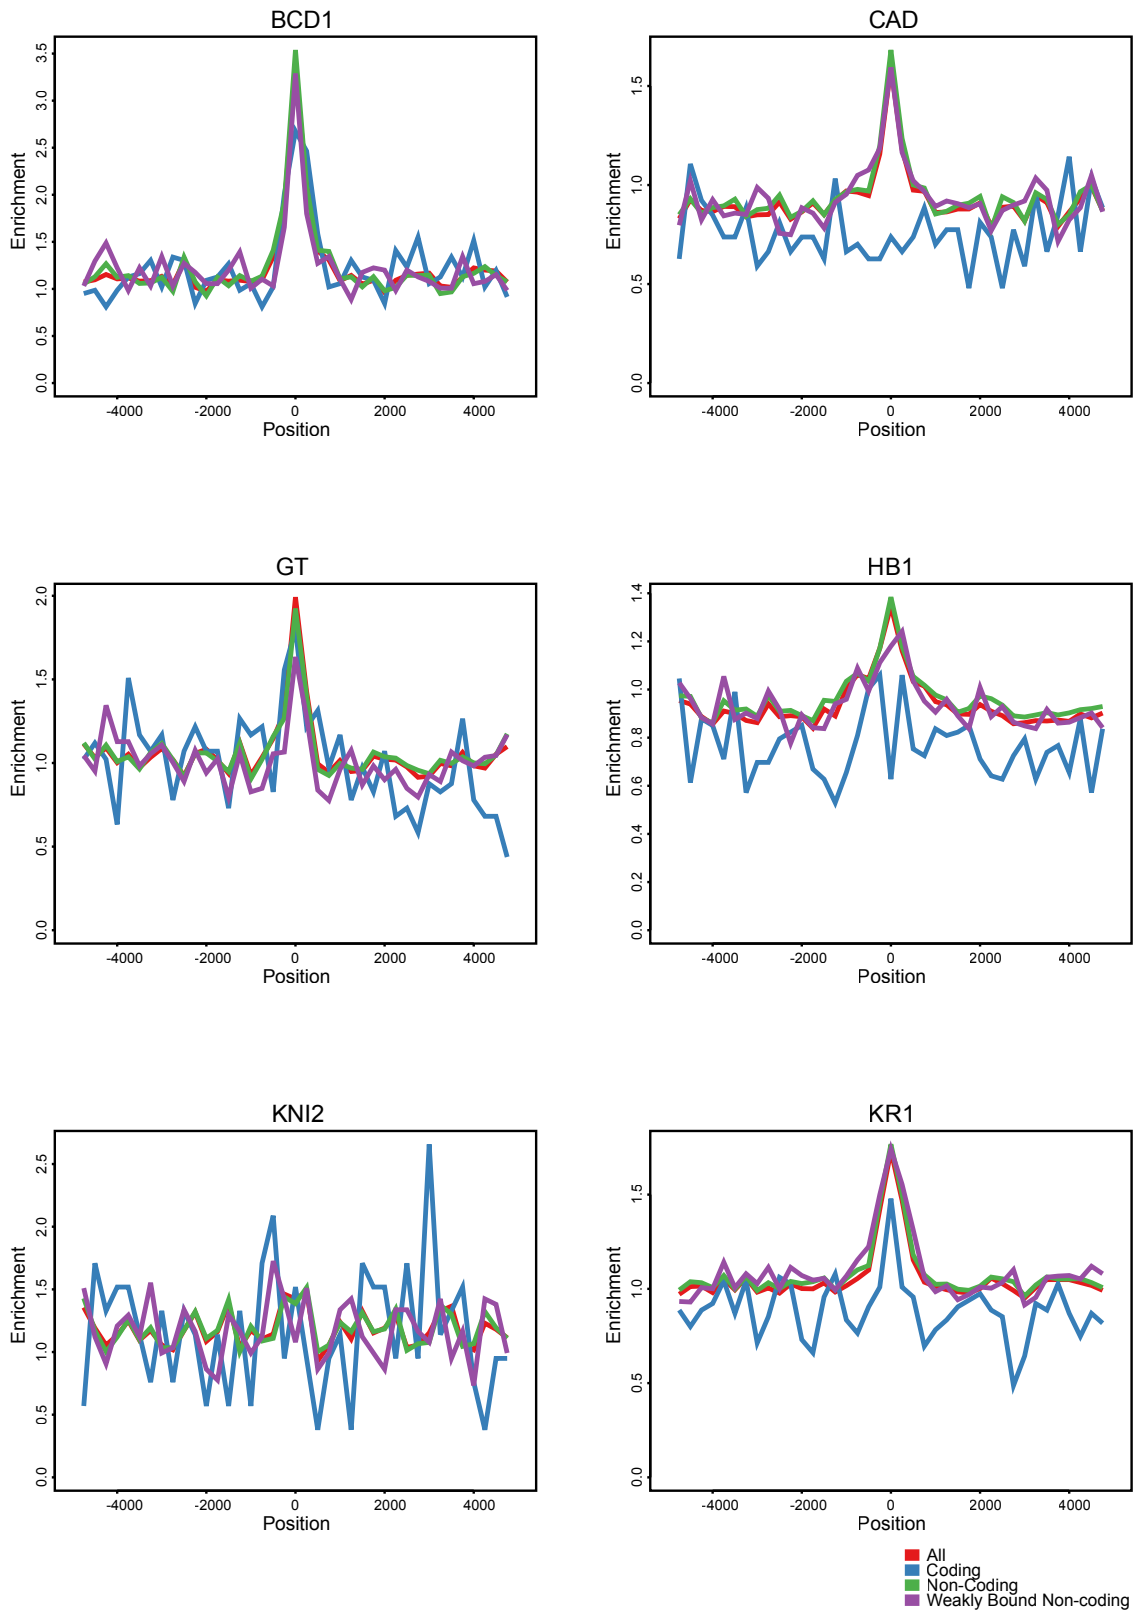

Figure S11

Supplement: pbio.0060027.sg011.pdf [file pbio.0060027.sg011.pdf]

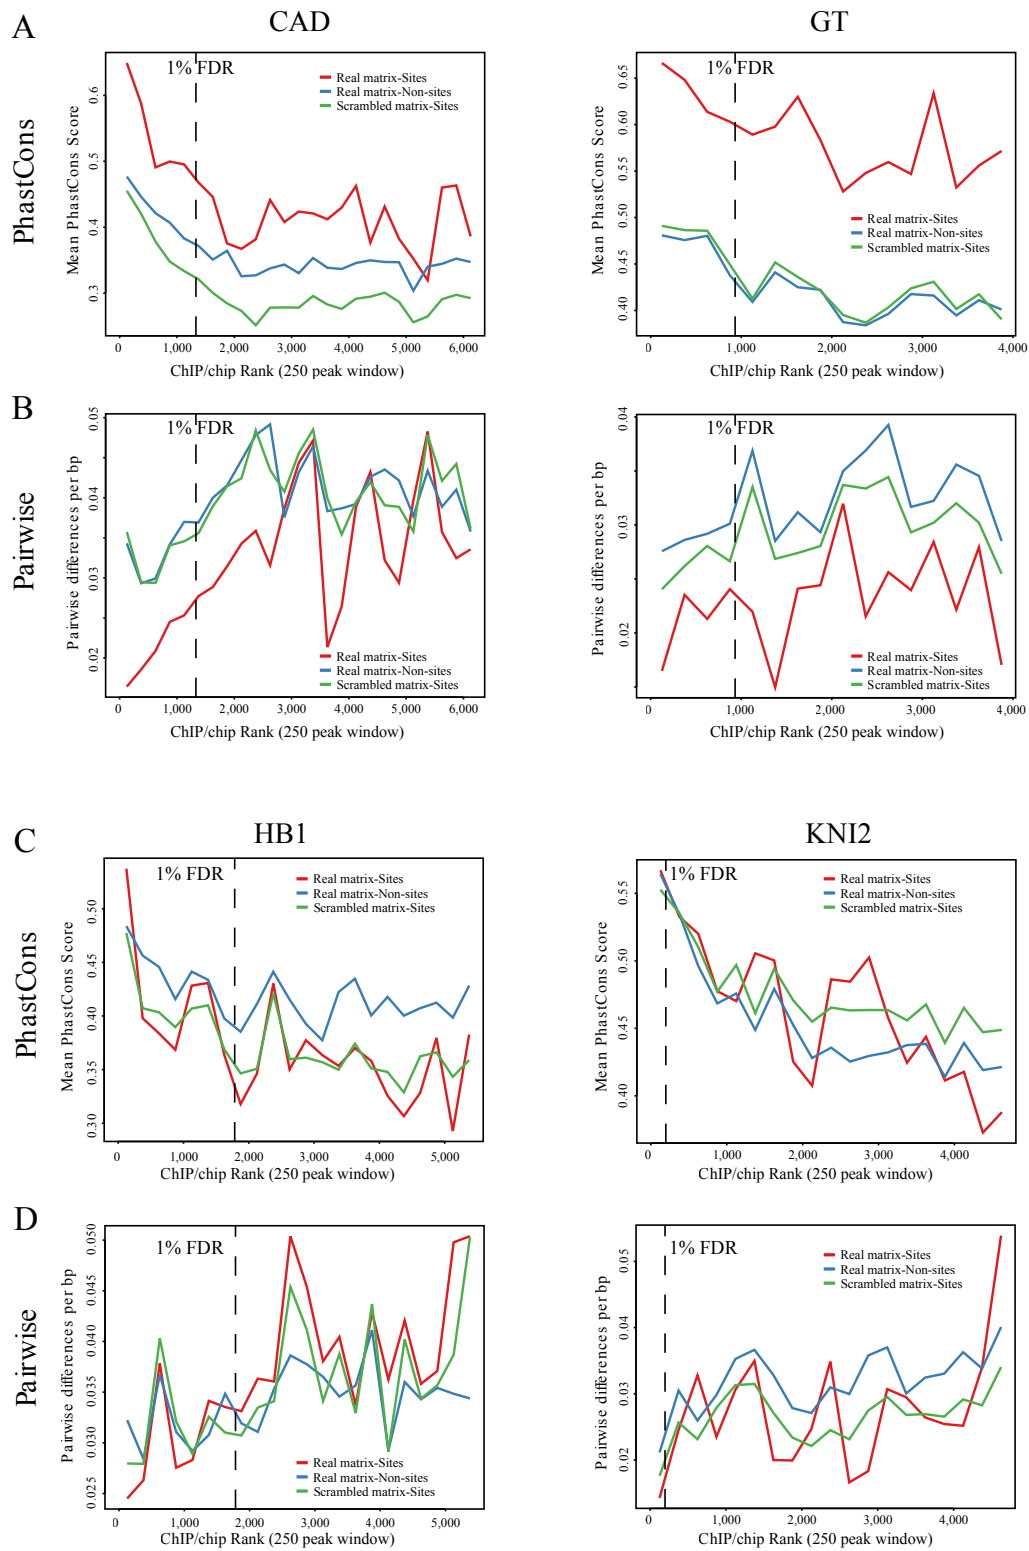

Figure S12

Supplement: pbio.0060027.sg012.pdf [file pbio.0060027.sg012.pdf]
